# Supplementary material for: Astrocytes in CA1 modulate schema establishment in the hippocampal-cortical neuron network
Source: PubMed Central journal article supplement (PMC9648012; doi:10.1186/s12915-022-01445-6), 2022-11-10

**A**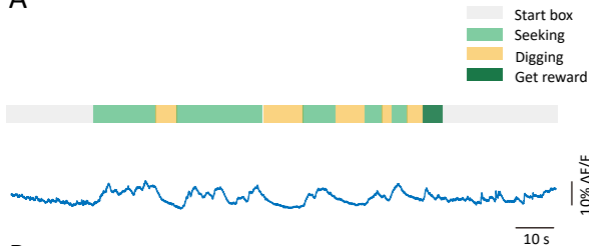**B**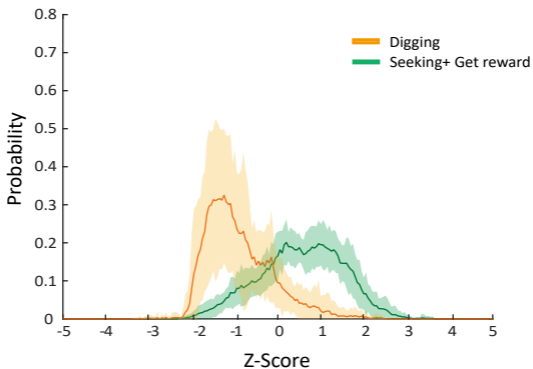

Supplement: 12915_2022_1445_MOESM1_ESM.pdf [file 12915_2022_1445_MOESM1_ESM.pdf]
