# Supplementary material for: Astrocytes in CA1 modulate schema establishment in the hippocampal-cortical neuron network
Source: PubMed Central journal article supplement (PMC9648012; doi:10.1186/s12915-022-01445-6), 2022-11-10

A

Saline/Home-cage

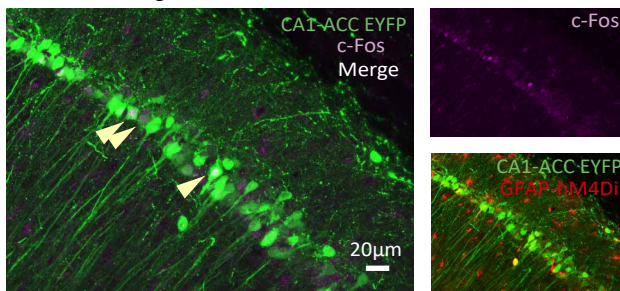

B

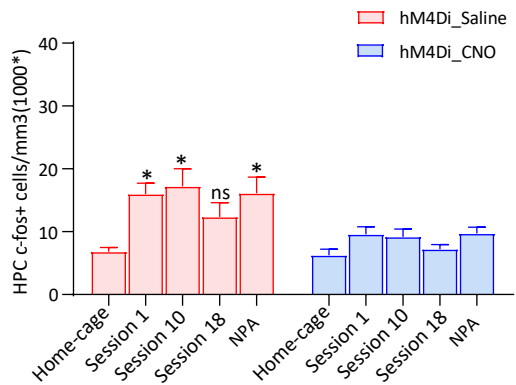

C

CNO/Home-cage

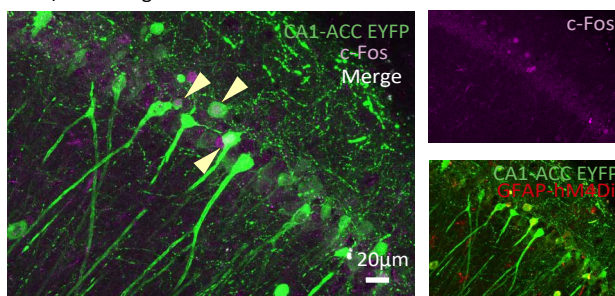

D

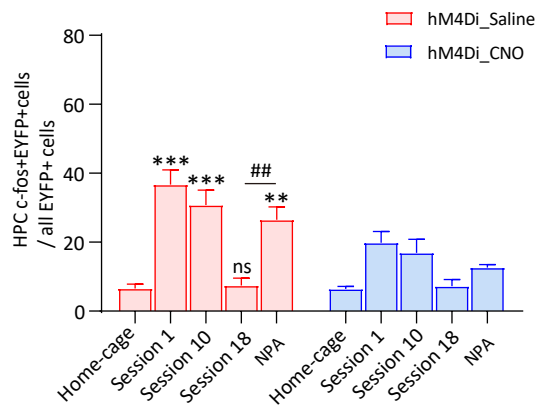

E

Saline/Home-cage

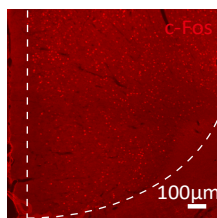

CNO/Home-cage

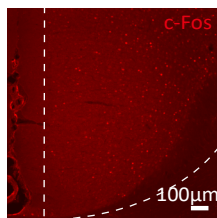

F

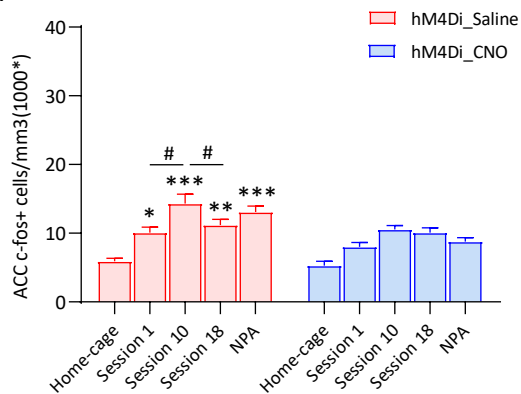

Supplement: 12915_2022_1445_MOESM2_ESM.pdf [file 12915_2022_1445_MOESM2_ESM.pdf]
