# Supplementary material for: Astrocytes in CA1 modulate schema establishment in the hippocampal-cortical neuron network
Source: PubMed Central journal article supplement (PMC9648012; doi:10.1186/s12915-022-01445-6), 2022-11-10
Supplement: 12915_2022_1445_MOESM4_ESM.pdf [file 12915_2022_1445_MOESM4_ESM.pdf]

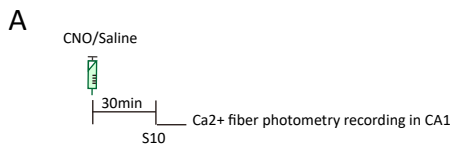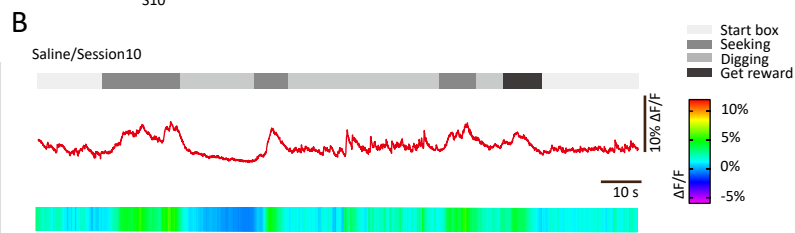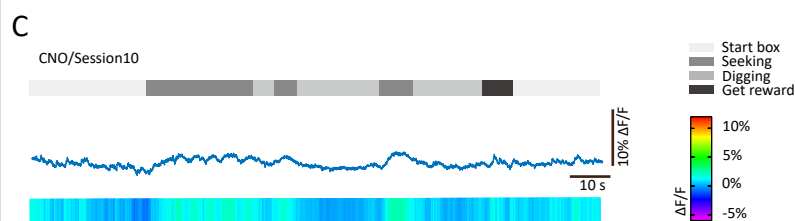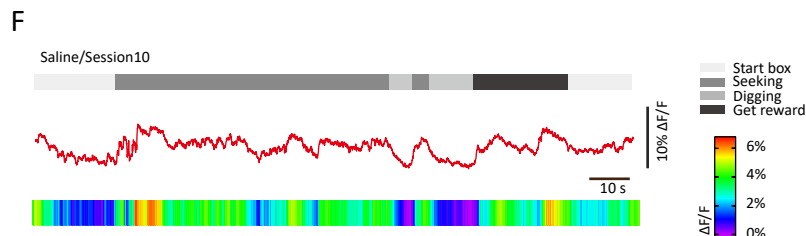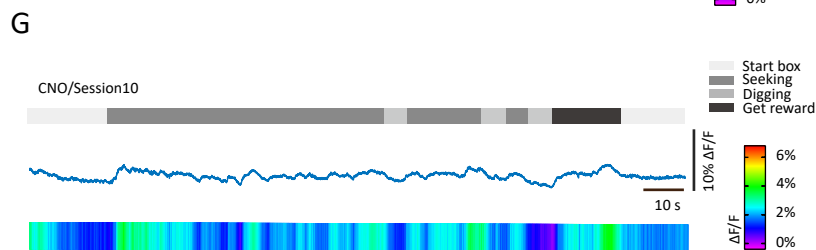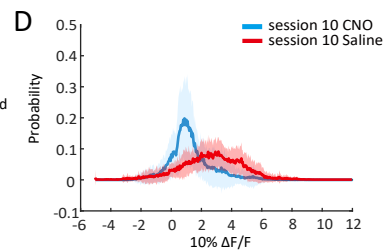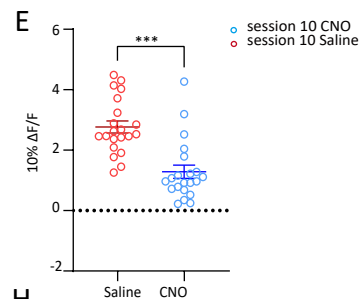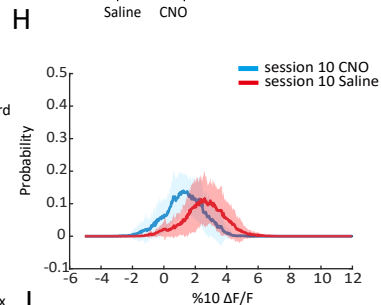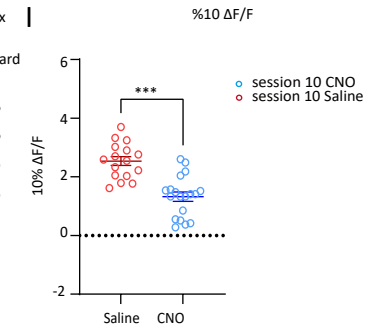

HPC/CA1

ACC
